# Supplementary material for: Throughout in vitro first spermatogenic wave: Next-generation sequencing gene expression patterns of fresh and cryopreserved prepubertal mice testicular tissue explants
Source: PubMed Central journal article supplement (PMC10063980; doi:10.3389/fendo.2023.1112834), 2023-03-17
Supplement: DataSheet_5.pdf [file DataSheet_5.pdf]

**Supplementary Table S1. Summary table of antibodies and fluorochromes used in the current study.**

| <b>Category</b>                          | <b>Antibodies</b>                  | <b>Host</b> | <b>Dilution</b> | <b>Source</b> | <b>Cat# No.</b> |
|------------------------------------------|------------------------------------|-------------|-----------------|---------------|-----------------|
|                                          | Anti-STRA8                         | Rabbit      | 1:1000          | Abcam         | ab49602         |
|                                          | Anti-rabbit<br>(biotin-conjugated) | Goat        | 1:200           | Abcam         | ab150113        |
| Control IgGs                             |                                    | Rabbit      | 1:200           | Invitrogen™   | 02-6102         |
| Alexa Fluor® 594-conjugated streptavidin |                                    | –           | 1:200           | Invitrogen™   | S32356          |
